# Supplementary material for: Novel therapeutic potential of angiotensin receptor 1 blockade in a rat model of diabetes-associated depression parallels altered BDNF signalling
Source: PubMed Central journal article supplement (PMC6647092; doi:10.1007/s00125-019-4888-z), 2019-05-03

## ESM Tables

**ESM Table 1.** Fluorescent immunohistochemistry primary antibodies

| <b>Protein Target</b>          | <b>Name of Antibody</b> | <b>Manufacturer</b>                              | <b>Catalog Number</b> | <b>Species Rised (Monoclonal or Polyclonal)</b> | <b>Dilution buffer</b>                  | <b>Dilution used</b> |
|--------------------------------|-------------------------|--------------------------------------------------|-----------------------|-------------------------------------------------|-----------------------------------------|----------------------|
| <b>BDNF</b>                    | anti-BDNF               | Abcam, Cambridge, MA, USA                        | 108319                | rabbit-monoclonal                               | 1x PBS, 20mM NA-azid, 0,3% Triton X-100 | 1:500                |
| <b>GFAP</b>                    | anti-GFAP               | Synaptic Systems, Goettingen, Germany            | 173006                | chicken-polyclonal                              |                                         |                      |
| <b>ICAM-1</b>                  | anti- ICAM-1/CD54       | R&D Systems, Minneapolis, MN, USA                | #AF796                | mouse-polyclonal                                |                                         |                      |
| <b>Iba1</b>                    | anti-AIF-1/Iba1         | Novusbio, Littleton, CO, USA                     | NB100-1028            | goat-polyclonal                                 |                                         |                      |
| <b>IL-1<math>\alpha</math></b> | anti-IL-1 alpha /IL-1F1 | R&D Systems, Minneapolis, MN, USA                | AF-400-NA             | goat-polyclonal                                 |                                         |                      |
| <b>P2Y12</b>                   | anti-P2Y12              | AnaSpec, Fermont, CA, USA                        | 55043A                | rabbit-polyclonal                               |                                         |                      |
| <b>p-CREB</b>                  | anti-pCREB              | Cell Signaling Technology Inc., Danvers, MA, USA | 87G3                  | goat-monoclonal                                 |                                         |                      |
| <b>PGP9.5</b>                  | anti-PGP9.5             | Abcam, Cambridge, MA, USA                        | 72910                 | chicken-polyclonal                              |                                         |                      |

**ESM Table 2.** Fluorescent immunohistochemistry secondary antibodies

| <b>Protein target</b> | <b>Name of Antibody</b>                                                                | <b>Manufacturer</b>                                    | <b>Catalog Number</b> | <b>Species Rised</b> | <b>Dilution buffer</b>                 | <b>Dilution used</b> |
|-----------------------|----------------------------------------------------------------------------------------|--------------------------------------------------------|-----------------------|----------------------|----------------------------------------|----------------------|
| <b>Chicken IgG</b>    | Alexa Fluor® 488 AffiniPure F(ab') <sub>2</sub> Fragment Donkey Anti-Chicken IgY (IgG) | Jackson ImmunoResearch Europe Ltd., Cambridgeshire, UK | 703-546-155           | donkey-polyclonal    |                                        |                      |
| <b>Goat IgG</b>       | Donkey anti-Goat IgG (H+L) Cross-Adsorbed Secondary Antibody, Alexa Fluor 594          | Thermo Fisher Scientific Waltham, MA USA               | A11058                | donkey-polyclonal    | 1xPBS, 20mM NA-azid, 0,3% Triton X-100 | 1:200                |
| <b>Mouse IgG</b>      | Alexa Fluor® 647 AffiniPure Donkey Anti-Mouse IgG                                      | Jackson ImmunoResearch Europe Ltd., Cambridgeshire, UK | 715-605-150           | donkey-polyclonal    |                                        |                      |
| <b>Rabbit IgG</b>     | Alexa Fluor® 488 AffiniPure F(ab') <sub>2</sub> Fragment Donkey Anti-Rabbit IgG        | Jackson ImmunoResearch Europe Ltd., Cambridgeshire, UK | 711-546-152           | donkey-polyclonal    |                                        |                      |

**ESM Table 3.** Immunoblot primary antibodies

| <b>Protein Target</b>          | <b>Name of Antibody</b> | <b>Manufacturer</b>                              | <b>Catalog Number</b> | <b>Species Rised (Monoclonal or Polyclonal)</b> | <b>Dilution buffer</b>                                       | <b>Dilution used</b> |
|--------------------------------|-------------------------|--------------------------------------------------|-----------------------|-------------------------------------------------|--------------------------------------------------------------|----------------------|
| <b>BDNF</b>                    | anti-BDNF               | Abcam, Cambridge, MA, USA                        | 108319                | rabbit-monoclonal                               | 1x TBS 0.05% wt/vol Tween 20                                 | 1:1000               |
| <b>Endothelin-1</b>            | anti-endothelin-1       | Abcam, Cambridge, MA, USA                        | 117757                | rabbit-polyclonal                               | 5% wt/vol non-fat milk, 1x TBS 0.05% wt/vol Tween 20         | 1:1000               |
| <b>Furin</b>                   | anti-furin              | Abcam, Cambridge, MA, USA                        | 183495                | rabbit-monoclonal                               | 5% wt/vol non-fat milk, 1x TBS 0.05% wt/vol Tween 20         | 1:2000               |
| <b>MMP3</b>                    | anti-MMP3               | Abcam, Cambridge, MA, USA                        | 52915                 | rabbit-monoclonal                               | 5% wt/vol non-fat milk, 1x TBS 0.05% wt/vol Tween 20         | 1:1000               |
| <b>NF-<math>\kappa</math>B</b> | anti-NF- $\kappa$ B p65 | Cell Signaling Technology Inc., Danvers, MA, USA | C22B4                 | rabbit-monoclonal                               | 5% wt/vol bovine serum albumin, 1x TBS 0.05% wt/vol Tween 20 | 1:1000               |
| <b>p75Ntr</b>                  | anti-p75NGF             | Abcam, Cambridge, MA, USA                        | 52987                 | rabbit-monoclonal                               | 1x TBS 0.05% wt/vol Tween 20                                 | 1:500                |
| <b>p-CREB</b>                  | anti-pCREB              | Cell Signaling Technology Inc., Danvers, MA, USA | 87G3                  | goat-monoclonal                                 | 1x TBS 0.05% wt/vol Tween 20                                 | 1:500                |
| <b>p-eNOS</b>                  | anti-peNOS              | Cell Signaling Technology Inc., Danvers, MA, USA | 9571                  | rabbit-polyclonal                               | 5% wt/vol bovine serum albumin, 1x TBS 0.05% wt/vol Tween 20 | 1:1000               |
| <b>p-ERK</b>                   | anti-pERK               | Santa Cruz Biotechnology, Santa Cruz CA, USA     | sc-7383               | mouse-monoclonal                                | 1x TBS 0.05% wt/vol Tween 20                                 | 1:500                |
| <b>p-JNK</b>                   | anti-pJNK               | Cell Signaling Technology Inc., Danvers, MA, USA | 9251                  | rabbit-polyclonal                               | 5% wt/vol bovine serum albumin, 1x TBS 0.05% wt/vol Tween 20 | 1:1000               |
| <b>TPA</b>                     | anti-TPA                | Abcam, Cambridge, MA, USA                        | 157469                | rabbit-monoclonal                               | 5% wt/vol non-fat milk, 1x TBS 0.05% wt/vol Tween 20         | 1:1000               |
| <b>TrkB</b>                    | anti-TrkB               | Santa Cruz Biotechnology, Santa Cruz CA, USA     | sc-8316               | rabbit-polyclonal                               | 1x TBS 0.05% wt/vol Tween 20                                 | 1:500                |

**ESM Table 4.** Immunoblot secondary antibodies

| <b>Protein target</b> | <b>Name of Antibody</b>            | <b>Manufacturer</b>                              | <b>Catalog Number</b> | <b>Species Rised</b> | <b>Dilution buffer</b>                | <b>Dilution used</b> |
|-----------------------|------------------------------------|--------------------------------------------------|-----------------------|----------------------|---------------------------------------|----------------------|
| <b>Goat IgG</b>       | Anti-goat IgG HRP-linked Antibody  | Santa Cruz Biotechnology, Santa Cruz CA, USA     | sc-2020               | donkey               |                                       |                      |
| <b>Mouse IgG</b>      | Anti-mouse IgG HRP-linked Antibody | Cell Signaling Technology Inc., Danvers, MA, USA | 7076                  | goat                 | 1x TBS<br>0.05%<br>wt/vol<br>Tween 20 | 1:3000               |
| <b>Rabbit IgG</b>     | Anti-mouse IgG HRP-linked Antibody | Cell Signaling Technology Inc., Danvers, MA, USA | 7074                  | goat                 |                                       |                      |

**ESM Table 5.** Sequence of forward and reverse primers for qRT-PCR

| Gene         | NCBI reference | Primer pairs                                                                      | Product length |
|--------------|----------------|-----------------------------------------------------------------------------------|----------------|
| <i>Il1a</i>  | NM_017019.1    | forward: 5' TCTGCCATTGACCATCTGTCTCTG 3'<br>reverse: 5' ACCACCCGGCTCTCCTTGAA 3'    | 152 bp         |
| <i>Il6</i>   | NM_012589.2    | forward: 5' GCCACTGCCTTCCCTACTTC 3'<br>reverse: 5' GCCATTGCACAACCTTTTTCTC 3'      | 153 bp         |
| <i>Tnf</i>   | NM_012675.3    | forward: 5' GGGGCCACCACGCTCTTCTGT 3'<br>reverse: 5' CTCCGCTTGGTGGTTTGCTACGAC3'    | 180 bp         |
| <i>Bcl2</i>  | NM_016993.1    | forward: 5' ATGGCGCAAGCCGGGAGAACAG 3'<br>reverse: 5' TGGCGACAAGGGGCCGTAGAGG 3'    | 232 bp         |
| <i>Bax</i>   | NM_017059.2    | forward: 5' AGCCGCCCCAGGACGCATCCA 3'<br>reverse: 5' CAGCCGCTCCCGGAGGAAGTCCAG 3'   | 299 bp         |
| <i>Rn18s</i> | NR_046237.1    | forward: 5' GCGGTCGGCGTCCCCCAACTTCTT 3'<br>reverse: 5' GCGCGTGCAGCCCCGGACATCTA 3' | 105 bp         |

**ESM Table 6.** Metabolic parameters were measured in control, diabetic (DM) and losartan-treated diabetic (DM+LOS) rats. Data are presented as means±SDs (n=6-8/group). \*\* p<0.01 or \*\*\* p<0.001 vs. C. LOS: losartan.

|                                           | Control   | DM          | DM+LOS      |
|-------------------------------------------|-----------|-------------|-------------|
| <b>Weight gain (Δg)</b>                   | 223±32.4  | 79.4±45.4** | 80.0±20.0** |
| <b>Non-fasting blood glucose (mmol/L)</b> | 13.2±1.62 | 44.6±9.13** | 43.2±8.09** |
| <b>Fructosamine (μmol/L)</b>              | 153±11.9  | 262±14.4*** | 249±18.2*** |

## ESM Figures

**ESM Figure 1.** Study design. STZ: streptozotocin, LOS: losartan, SPECT: Single photon emission computed tomography, MRI: Magnetic Resonance Imaging, OFT: open field test; FST: forced swim test.

### Protocol 1.

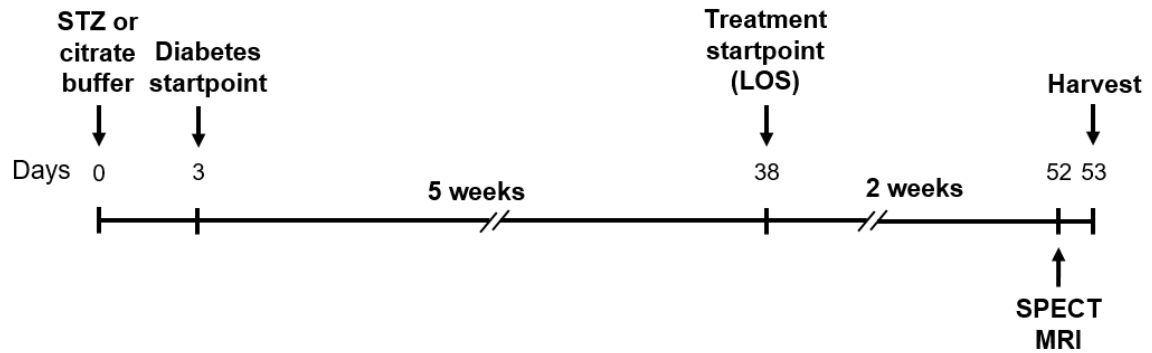

### Protocol 2.

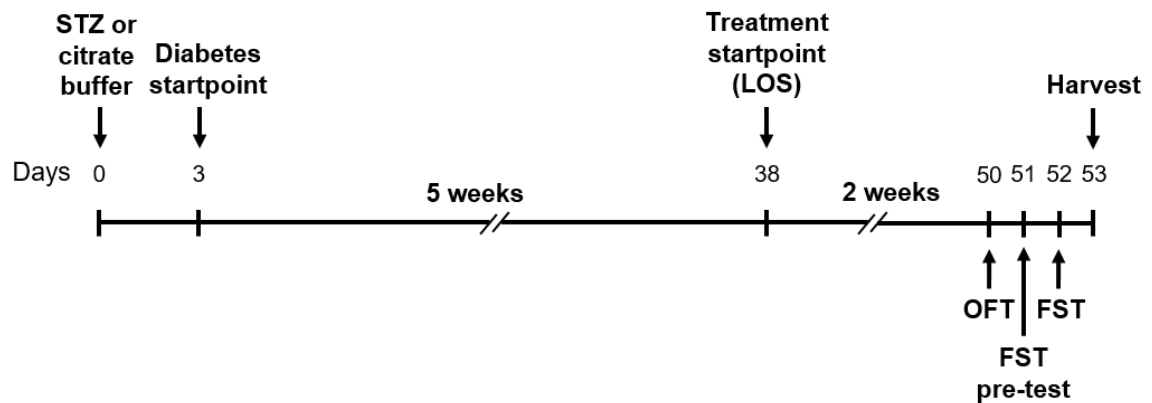

**ESM Figure 2.** Microglia were visualized by Iba1 to assess microglial activation in the hippocampus of control, diabetic (DM) and diabetic losartan-treated rats (DM+LOS). Arrowheads showing microglia with increased Iba1 expression, thicker cell bodies and a partial withdrawal of processes, indicative of higher level of microglial activity. Blinded evaluation is showing elevated numbers of activated microglia in the hippocampus of diabetic rats. Data are presented as means±SDs, (n=5-7/group). \* $p < 0.05$  vs. C. Scale bar: 50  $\mu$ m.

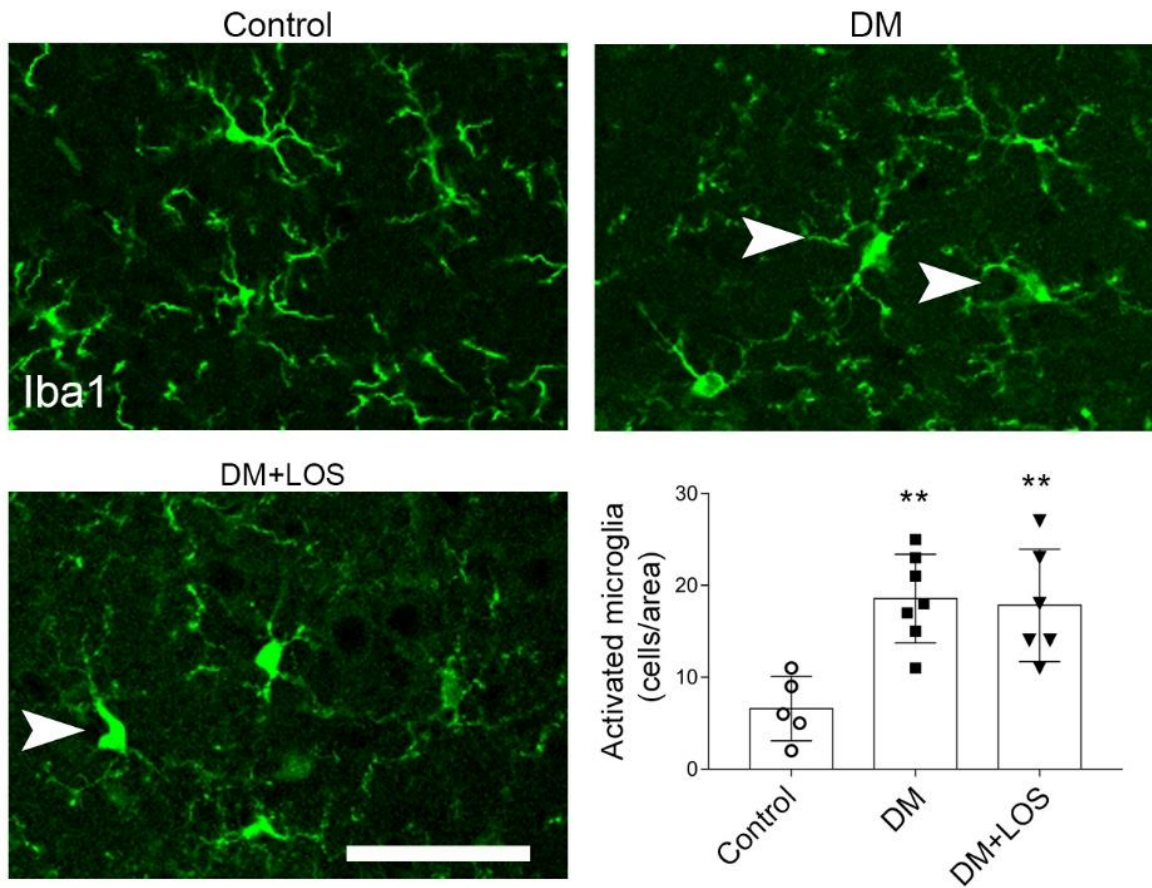

**ESM Figure 3.** Ponceau S-stained membranes of the representative samples. (a) Ponceau S-stained membranes of the representative examples of Figure 2 and 3. (b) Ponceau S-stained membranes of the representative examples of Figure 4. (c) Ponceau S-stained membranes of the representative examples of Figure 5. Black rectangles show the region of protein of interest. DM: diabetic group; DM+LOS: diabetic losartan-treated group.

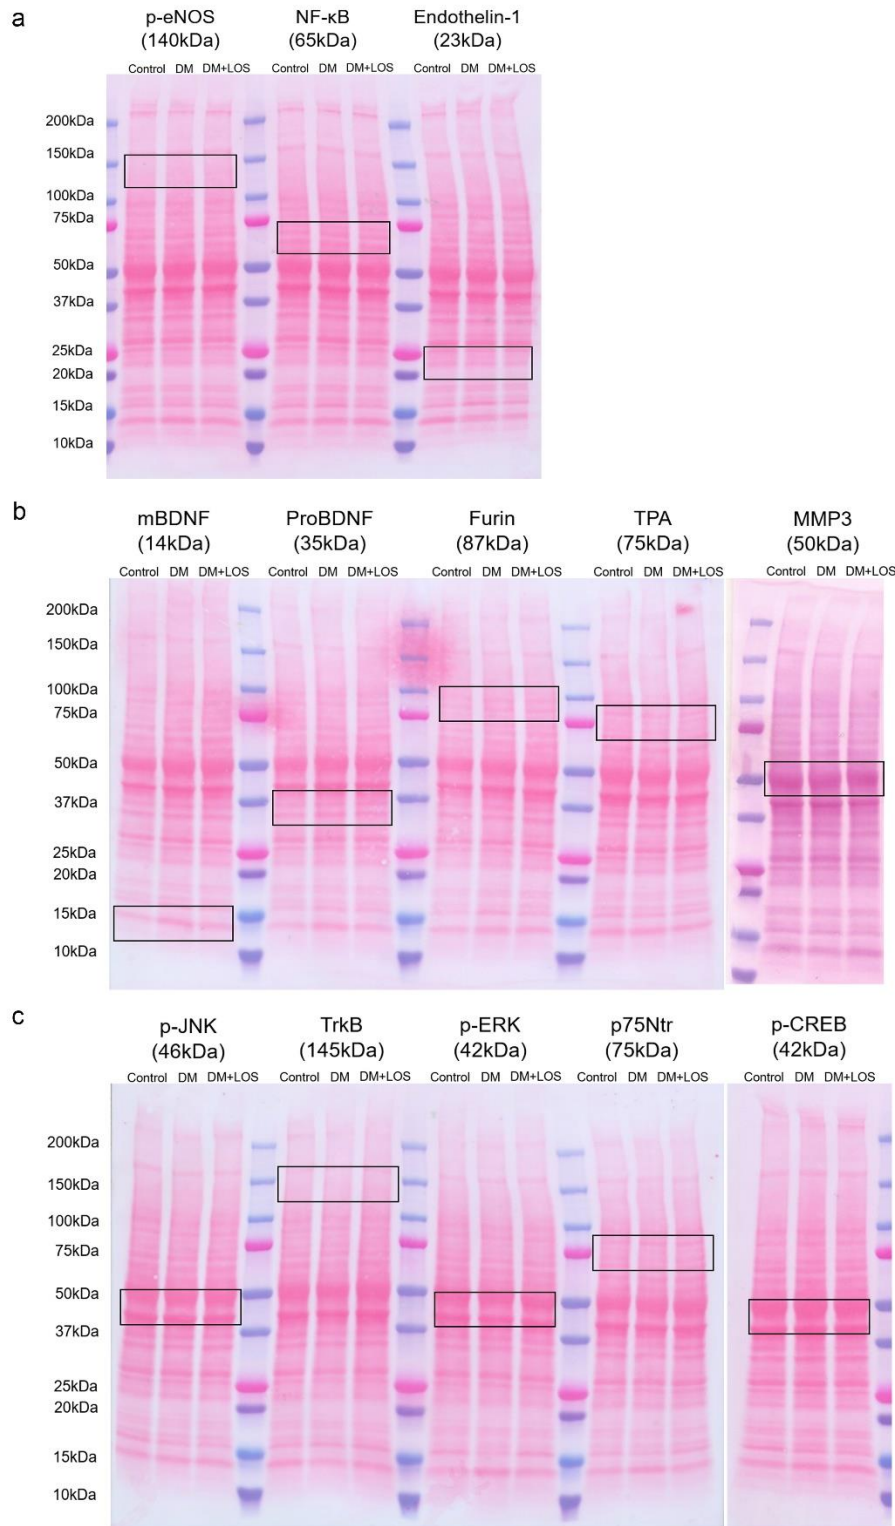

Supplement: 125_2019_4888_MOESM1_ESM.pdf [file 125_2019_4888_MOESM1_ESM.pdf]
